# Supplementary material for: First rhenium complexes based on cyclotriphosphazene scaffolds with exocyclic pyrazolyl substituentsElectronic supplementary information (ESI) available: experimental details. See http://www.rsc.org/suppdata/cc/b2/b203254f/
Source: Royal Society of Chemistry journal article supplement (doi:10.1039/b203254f), 2002-05-24
Supplement: b203254f.doc [file b203254f.doc]

# Supplementary Material (ESI) for Chemical Communications

# This journal is © The Royal Society of Chemistry 2002

First rhenium complexes based on cyclotriphosphazene scaffolds with exocyclic pyrazolyl substituents

submitted to Chemical Communications, 2002

by

# Michael Harmjanz, Brian L. Scott, Carol J. Burns*

**Materials and Instrumentation:**

All manipulations have been carried out under an argon (**2**, **3**) or helium atmosphere (**1a**, **2a**, **3a**) respectively with dry and degassed solvents. Pyrazole and [ReCl(CO)5]were purchased from Aldrich and used as received.

Hexakis(3,5-dimethylpyrazolyl)cyclotriphosphazene [P3N3(3,5-Me2Pz)6, (**1**)], [1] 2,2,-dichloro-4,4,6,6-bis(*spiro*-N,N’-dimethylethylenediamino)cyclotriphosphazene [2], 2,2-dichloro-4,4,6,6-bis[*spiro*(2’2’’-dioxy-1’1’’-biphenyl]cyclotriphosphazene [3] as well as the metal complexes [ReCl(CH3CN)2(CO)3], [4] [Re(CH3CN)3(CO)3]+SbF6 [5] were prepared as described in previously reported procedures.

Microanalyses (C, H and N) for **2**, **3**, **1a** and **3a** were performed by the Micro-Mass Facility at the University of Berkeley. Microanalysis for **2a** hasbeen performed on a Perkin Elmer Series II CHNS/O Analyzer 2400 at Los Alamos National Laboratory. 1H and 31P NMR spectra were recorded on a Varian Inova 300 MHz spectrometer (31P; 121 MHz).

## Preparation of compounds:

*Synthesis of 2,2-dipyrazolyl-4,4,6,6-bis(spiro-N,N’-dimethylethylenediamino)cyclo-triphosphazene (****2****)*

A portion of [P3N3Cl2(MeNC2H4NMe)2] (0.85 g, 2.25 mmol) was mixed with 5.0 g (73.4 mmol) of pyrazole. The mixture was refluxed for 3 h. After cooling to room temperature, the mixture was washed with hot cyclohexane (3 x 45 mL) yielding a yellow oil, which slowly solidifies upon cooling. The residue was redissolved in CH2Cl2 and washed with water (3 x 15 mL). The organic solution was dried with Na2SO4 and evaporated to dryness yielding 0.75 g (76 %) of **2** as a white crystalline material. 1H-NMR (CDCl3)  7.97 (d, 2 H, *J* = 1.8 Hz) 7.76 (m, 2H), 6.33-6.32 (m, 2H) 3.18 (m, 8H, *JPH* = 11 Hz) 2.55 (m, 12 H, *JPH* =12 Hz). 31P-NMR (CDCl3)  28.34 (d, *JPP* = 58 Hz), 6.82 (d, *JPP =* 58 Hz). Anal. Calcd for C14H26N11P3: C, 38.10; H, 5.94; N, 34.91. Found: C, 38.00; H, 6.16; N, 34.61.

*Synthesis of 2,2-dipyrazolyl-4,4,6,6-bis[spiro(2’2’’-dioxy-1’1’’-biphenyl]cyclotri-phosphazene (****3****)*

A portion of P3N3Cl2(2,2’-O2C12H8)2 (1.30 g, 2.26 mmol) was mixed with 8.00 g (117.5 mmol) of solid pyrazole. The mixture was refluxed for 2 h. After cooling to room temperature the mixture was repeatedly washed with 60 mL of hot cyclohexane (3x) to remove the excess pyrazole. The remaining white solid was dissolved in CH2Cl2 (60 mL) and washed with water (45 mL, 3x). The organic solution was dried (Na2SO4) and evaporated to dryness. The solid residue was recrystallized from toluene to yield 1.18 g (82%) of **3**. 1H-NMR (CDCl3)  8.18 (d, 2H, *J* = 2.7 Hz), 7.80 (m, 2H), 7.52-7.230 (m, 16 H), 6.42 –6.41 (m, 2H). 31P-NMR (CDCl3)  23.84 (d, *JPP* = 81 Hz), 4.65 (t, *JPP* = 81 Hz). Anal. Calcd for C30H22O4N7P3: C, 56.52; H, 3.48; N, 15.38. Found: C, 56.69; H, 3.58; N, 15.40.

*Synthesis of fac-[Re(CO)3{P3N3(3,5-Me2Pz)6}][Re2Cl3(CO)6] (****1a****)*

A sample of [P3N3(3,5-Me2Pz)6] (250 mg, 0.35 mmol) was suspended in 15 mL of toluene and [ReCl(CO)5] (385 mg, 1.06 mmol) was added. The reaction mixture was refluxed for 5 h. During this time, the starting materials gradually dissolved and an oil formed. The toluene was completely removed and the residue was dissolved in a minimal amount of CH3CN ( 3 mL). Gradual addition of diethyl ether leads to the formation of an oil, which slowly crystallizes. Yield: 320 mg (56 %). 1H-NMR (CD3CN)  6.35 (bs, 2H), 6.31 (d, 1H, *J* = 4.7 Hz), 6.25 (bs, 2H), 6.01 (d, 1H, J = 2.7 Hz), 2.58 (s, 6H), 2.32 (s, 3H), 2.26 (9H), 2.21 (s, 6H), 2.13 (s, 6H), 1.67 (s, 3H), 1.64 (s, 3H). 31P-NMR (CD3CN)  6.13 (d, *JPP* = 53 Hz), 2.24 (t, *JPP* = 53 Hz). Anal. Calcd for C39H42O9N15P3Cl3Re3 : C, 28.87; H, 2.61; N, 12.95. Found: C, 28.95; H, 2.69; N, 12.77.

*Synthesis of fac-[Re(CO)3{P3N3(MeNC2H4NMe)2Pz2}]SbF6 (****2a****)*

A portion of P3N3(MeNC2H4NMe)2Pz2 (250 mg, 0.57 mmol) was dissolved in 25 mL of THF and 450 mg (0.72 mmol) of [Re(CH3CN)3(CO)3]SbF6 was added. The mixture was refluxed for 24 h. The solvent was removed *in vacuo* and the white solid residue was redissolved in 20 mL CHCl3. Insoluble material was filtered off and removal of the solvent yields a white powder which was dissolved in 3 mL of CH3CN. Addition of diethyl ether to this solution yields **2a** as a white crystalline material. Yield: 345 mg (64%). 1H-NMR (CD3CN):  8.36 (bs, 2H), 8.10 (bs, 2H), 6.67 (bs, 2H), 3.37 (m, 8H), 2.62 (d, 6H, *JPH* = 12 Hz), 2.44 (d, 6H, *JPH =* 11 Hz). 31P-NMR (CDCl3):  25.21 (dd, *J1 PP =* 38 Hz, *J2 PP* = 51 Hz), 21.91 (dd, *J1 PP* = 38 Hz, *J2 PP* = 58 Hz), 11.01 (dd, *J1 PP =* 51 Hz, *J2 PP* = 58 Hz). Anal. Calcd for C17H26N11O3F6P3SbRe: C, 21.54; H, 2.77; N, 16.27. Found: C, 21.80; H, 3.05; N, 16.44.

*Synthesis of [ReCl(CO)3{P3N3(O2C12H8)2Pz2}] (****3a****)*

A sample of P3N3(2,2’-O2C12H8)2Pz2 (200 mg, 0.31 mmol) was dissolved in 15 mL CHCl3 and 122 mg (0.31 mmol) of [ReCl(CH3CN)2(CO)3] was added. The mixture was refluxed for 4 h. During this time a white microcrystalline solid precipitated out of the reaction mixture, which was filtered, dried *in vacuo* andsubsequently recrystallized by diffusion of ether into a solution of the crude product in DMF.

Yield: 234 mg (79%). 1H-NMR (DMF-d7):  8.81 (m, 2H), 8.54 (m, 2H), 7.88 – 7.20 (m, 16 H) 7.00 (m, 2H). 31P-NMR (DMF-d7):  25.20 (dd, *J1 PP =* 80 Hz, *J2 PP* = 88 Hz), 19.80 (dd, *J1 PP* = *J2 PP* = 88 Hz), 3.55 (dd, *J1 PP =* 80 Hz, *J2 PP* = 87 Hz). Anal. Calcd for C33H22N7O7ClP3Re: C, 42.02; H, 2.35; N, 10.40. Found: C, 42.01; H, 2.21; N, 10.38.

1 K. R. J. Thomas, V. Chandrasekhar, P. Pal, S. R. Scott, R. Hallford and A. W. Cordes, *Inorg. Chem.,* 1993, **32**, 606.

1. T. Chivers and R. Hedgeland, *Can. J. Chem.,* 1972, **50**, 1017.
2. I. Dez and R. De Jaeger, *Phosphourus, Sulfur, Silicon*, 1997, **130**, 1.
3. M. F. Farona and K. F. Kraus, Inorg. Chem., 1970, 9, 1700..
4. Edwards, D. A. and Marshalsea, J. *J. Organomet. Chem.,* 1977, **131**, 73.
